# Supplementary material
Source: MDPI journal article supplement (https://www.mdpi.com/2073-4441/16/6/906)
Supplement: s1 [file s1]

## **Supplementary Information**

### **Seasonal freezing drives spatiotemporal dynamics of dissolved organic matters (DOMs) and microbial communities in reclaimed water recharged river**

Jiaqi Zhao <sup>1,2</sup>, Yang Huo <sup>2,3,\*</sup>, Zhiruo Zhang <sup>4</sup>, Ying Zhang <sup>1,2</sup>, Zhenlai Hou <sup>1,2</sup>, Wei Fan <sup>1,2</sup>, Zhi Geng <sup>1,2</sup>, Mingxin Huo <sup>1,2</sup>

<sup>1</sup> School of Environment, Northeast Normal University, Changchun 130117, China.

<sup>2</sup> Science and Technology Innovation Center for Municipal Wastewater Treatment and Water Quality Protection, Northeast Normal University, Changchun 130117, China.

<sup>3</sup> Center for Advanced Optoelectronic Functional Materials Research, Key Laboratory of UV Light-Emitting Materials and Technology of Ministry of Education, Northeast Normal University, 5268 Renmin Street, Changchun 130024, People's Republic of China.

<sup>4</sup> Key Laboratory of Songliao Aquatic Environment, Ministry of Education, Jilin Jianzhu University, Changchun 130118, China.

Corresponding author:

\* Yang Huo

E-mail: huo0814@outlook.com

**Table S1.** The latitude and longitude information of each sampling sites.

| Sampling site | Latitude     | Longitude     | Distance / km* |
|---------------|--------------|---------------|----------------|
| Y3            | N43°71'06.5" | E125°35'24.0" | --             |
| Y4            | N43°79'40.3" | E125°34'26.6" | 9.32           |
| Y5            | N43°79'77.2" | E125°34'33.1" | 0.4            |
| Y6            | N43°80'20.8" | E125°34'18.7" | 0.5            |
| Y7            | N43°84'10.8" | E125°35'53.8" | 4.47           |
| Y8            | N43°88'43.4" | E125°35'32.4" | 4.82           |
| Y10           | N43°94'63.5" | E125°36'64.7" | 7              |
| Y11           | N43°95'52.3" | E125°35'67.3" | 1.27           |
| Y12           | N43°95'68.8" | E125°36'46.1" | 0.65           |
| Y13           | N43°96'67.1" | E125°36'39.9" | 1.1            |

\*The distance of adjacent sampling points.

**Table S2.** Accession Identifiers for the raw reads uploaded to the National Center for Biotechnology Information (NCBI) Sequencing Read Archive (SRA).

|                                            |                        |
|--------------------------------------------|------------------------|
| Sequencing Read Archive Study Accession ID | SRP296939              |
| BioProject Accession ID                    | PRJNA683092            |
| Sample Name                                | BioSample Accession ID |
| Y3                                         | SAMN37346636           |
| Y4                                         | SAMN37346637           |
| Y5                                         | SAMN37346638           |
| Y6                                         | SAMN37346639           |
| Y7                                         | SAMN37346640           |
| Y8                                         | SAMN37346641           |
| Y10                                        | SAMN37346642           |
| Y11                                        | SAMN37346643           |
| Y12                                        | SAMN37346644           |
| Y13                                        | SAMN37346645           |
| Y3F                                        | SAMN38368947           |
| Y5F                                        | SAMN38368948           |
| Y6F                                        | SAMN38368949           |
| Y7F                                        | SAMN38368950           |
| Y8F                                        | SAMN38368951           |
| Y11F                                       | SAMN38368952           |
| Y13F                                       | SAMN38368953           |

F: ice-sealed period.

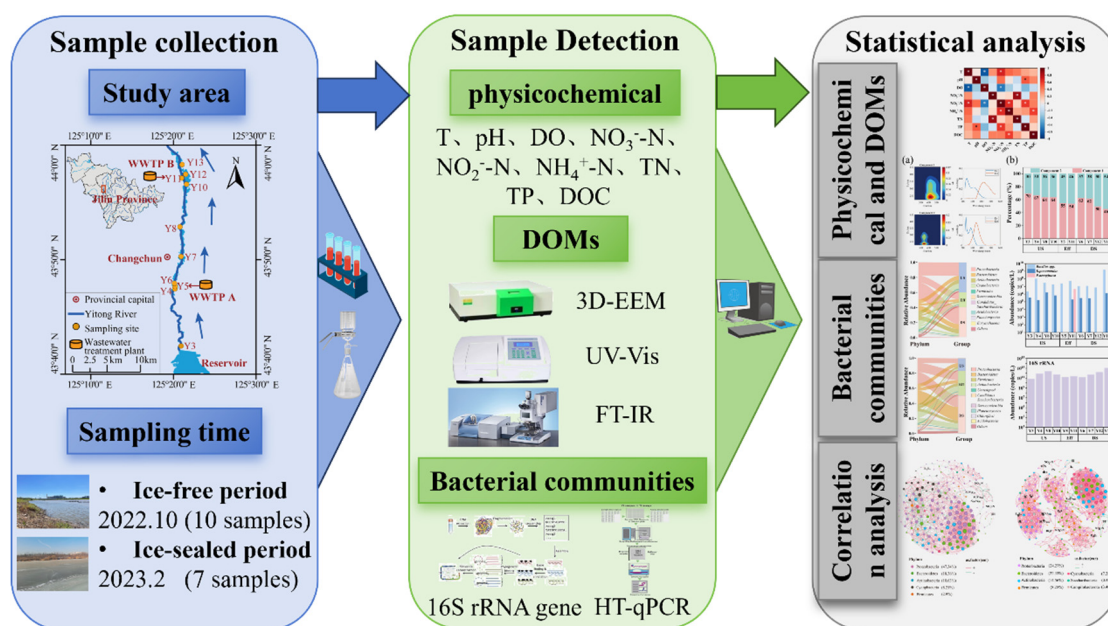

Figure S1. Flowchart of experimental content

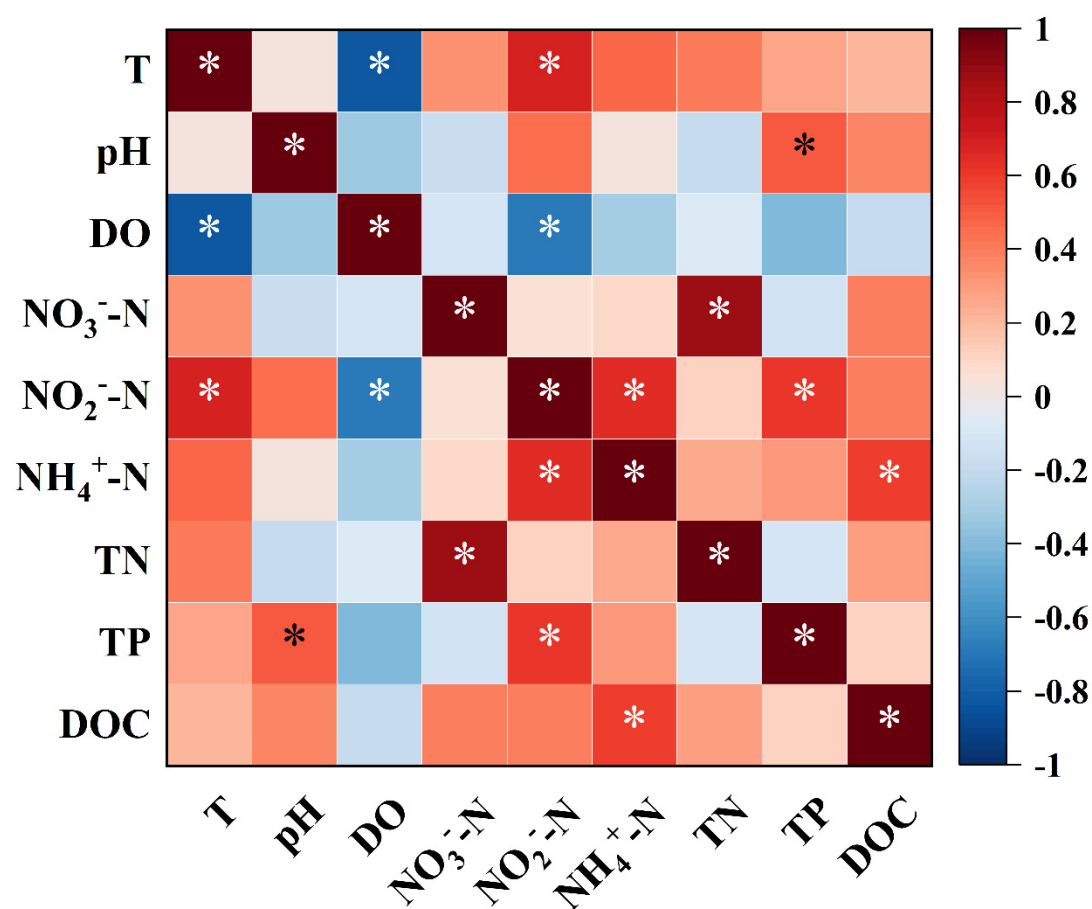

Figure S2. Spearman correlation analysis of water quality indicators, \*  $p < 0.05$ .

**Table S3.** Meaning of the characteristic parameters of the UV spectra

| UV spectral characterization parameters | Calculation methodology                                                                                                 | References |
|-----------------------------------------|-------------------------------------------------------------------------------------------------------------------------|------------|
| $A_{253}/A_{203}$                       | The absorbance ratio of organic matter at 253 nm and 203 nm                                                             | [1]        |
| $E_2/E_3$                               | The absorbance ratio of organic matter at wavelengths of 250 nm and 365 nm                                              | [2]        |
| $E_2/E_4$                               | The absorbance ratio of organic matter at wavelengths of 254 nm and 436 nm                                              | [3]        |
| $S_R$                                   | The ratio of spectral slopes in the 275 nm to 295 nm wavelength range to those in the 350 nm to 400 nm wavelength range | [4]        |

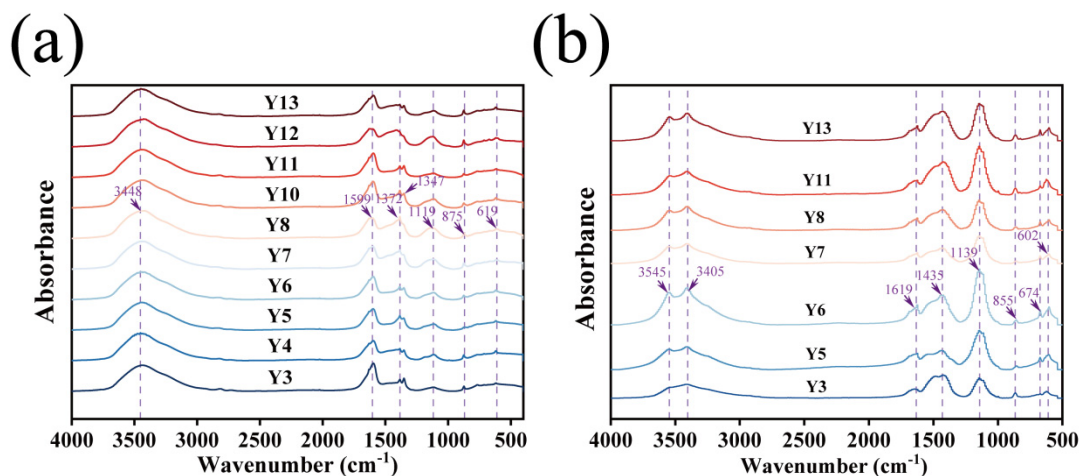

**Figure S3.** Region between 4000 and 400  $\text{cm}^{-1}$  of typical FT-IR absorbance: (a) ice-free period; (b) ice-sealed period.

**Table S4.** Alpha diversity indexes of the river

|      | Shannon | Simpson | Chao1   | Ace     |
|------|---------|---------|---------|---------|
| Y3O  | 5.41    | 0.99    | 1381.66 | 1326.83 |
| Y4O  | 5.67    | 0.98    | 1588.86 | 1553.79 |
| Y5O  | 5.88    | 0.98    | 1275.27 | 1270.99 |
| Y6O  | 5.34    | 0.99    | 1702.35 | 1693.49 |
| Y7O  | 5.21    | 0.98    | 1687.13 | 1661.36 |
| Y8O  | 5.38    | 0.99    | 1668.31 | 1668.00 |
| Y10O | 5.34    | 0.98    | 1446.46 | 1437.37 |
| Y11O | 6.07    | 0.99    | 1623.30 | 1616.50 |
| Y12O | 4.86    | 0.98    | 1136.28 | 1113.39 |
| Y13O | 3.51    | 0.85    | 795.19  | 799.23  |
| Y3F  | 4.11    | 0.02    | 81.00   | 81.00   |
| Y5F  | 6.23    | 0.99    | 2854.38 | 2834.33 |
| Y6F  | 5.94    | 0.99    | 2871.71 | 2846.88 |
| Y7F  | 5.96    | 0.99    | 2794.27 | 2781.84 |
| Y8F  | 5.48    | 0.98    | 2579.48 | 2562.19 |
| Y11F | 5.98    | 0.98    | 2572.29 | 2518.00 |
| Y13F | 4.63    | 0.94    | 2762.80 | 2820.69 |

## References

1. Peuravuori J, Pihlaja K. Molecular size distribution and spectroscopic properties of aquatic humic substances. *Anal. Chim. Acta.* **1997.** 337, 133-49.
2. Niu C, Zhang Y, Zhu G, Wang M, Zhou Y, Liu X. Comparison of optical properties of DOM and CDOM in lake Tianmuhu catchment. *Res. Environ. Sci.* **2014.** 27, 998-1007.
3. Helms JR, Stubbins A, Ritchie JD, Minor EC, Kieber DJ, Mopper K. Absorption spectral slopes and slope ratios as indicators of molecular weight, source, and photobleaching of chromophoric dissolved organic matter. *Limnol. Oceanogr.* **2008.** 53, 955-69.
4. Praise S, Ito H, An Y, Watanabe K, Watanabe T. Dissolved organic matter characteristics along sabo dammed streams based on ultraviolet visible and fluorescence spectral properties. *Environ. Monit. Assess.* **2018.** 90, 146.
